# Supplementary material
Source: PubMed Central journal article supplement (PMC10064285)
Supplement: jamaotolaryngolheadnecksurg-e230268-s001.pdf [file jamaotolaryngolheadnecksurg-e230268-s001.pdf]

## Data Sharing Statement

Johnson. Estimated Probability Distribution of Bleeding After Pediatric Tonsillectomy. *JAMA Otolaryngol Head Neck Surg*. Published March 30, 2023. doi:10.1001/jamaoto.2023.0268

### Data

**Data available:** No

### Additional Information

**Explanation for why data not available:** The data is the property of the Children's Hospital Association.
